# Supplementary material
Source: PubMed Central journal article supplement (PMC11005665)

# Supplemental Fig. 1:

**1A.** Healthy Donor PBMC

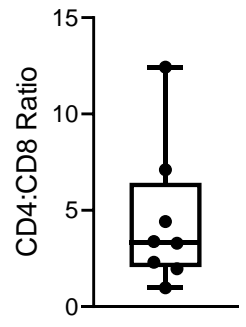

**1B.**

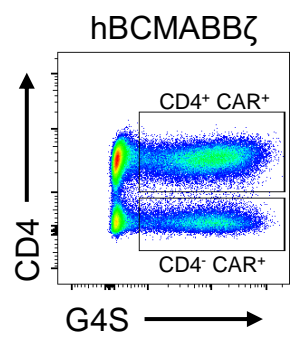

**1C.**

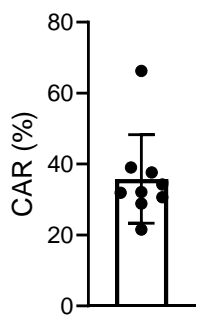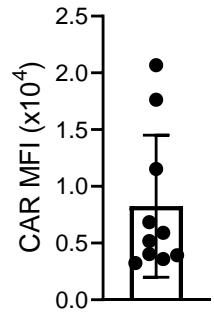

**1D.**

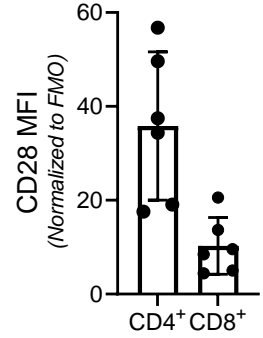

**1E.**

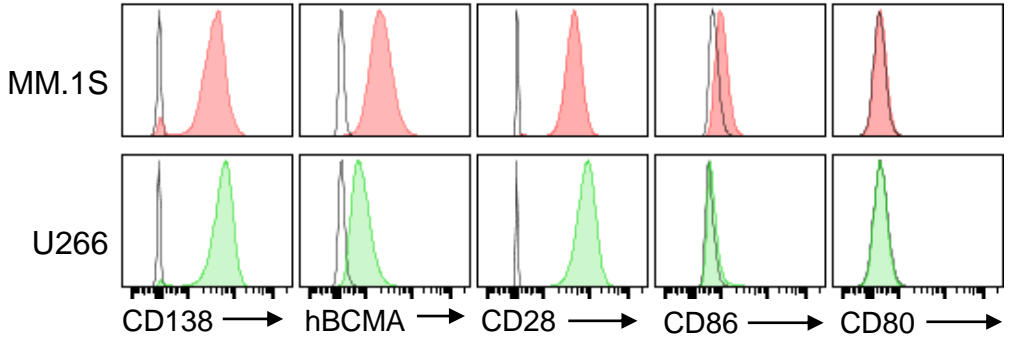

**1F.**

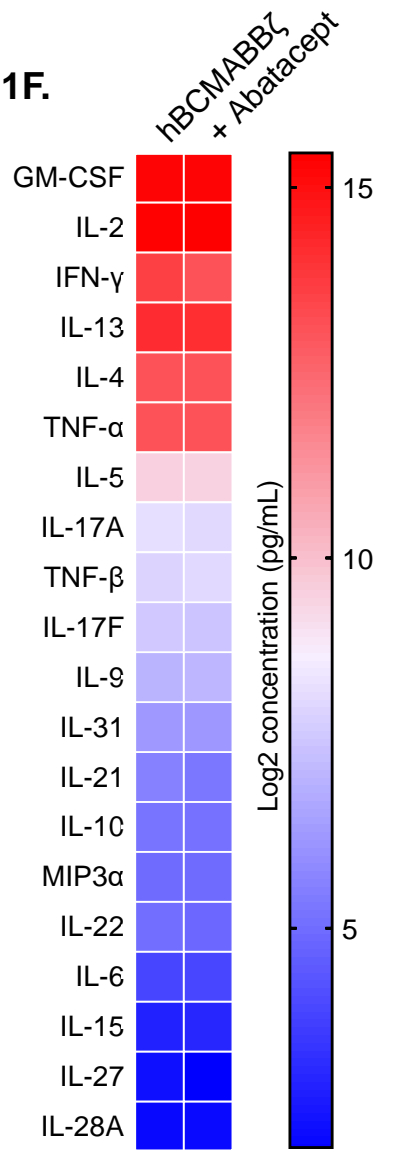

# Supplemental Fig. 2:

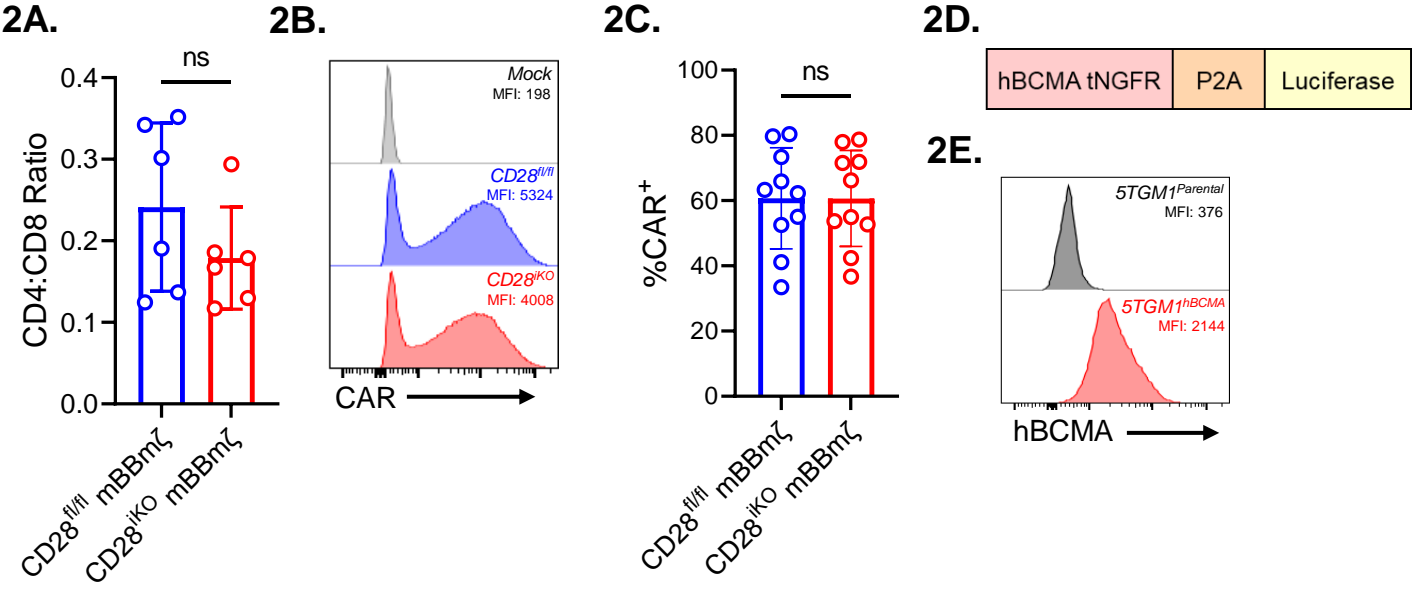

# Supplemental Fig. 3:

3A.

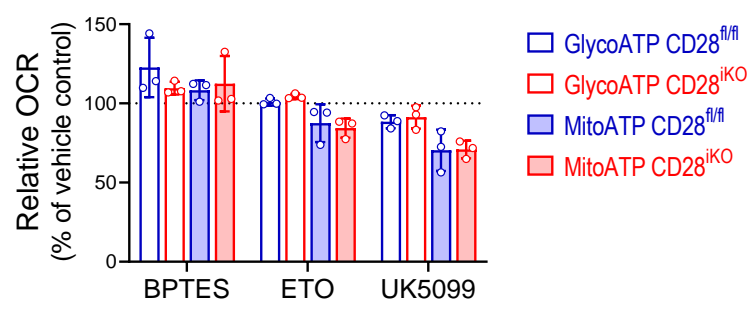

3B.

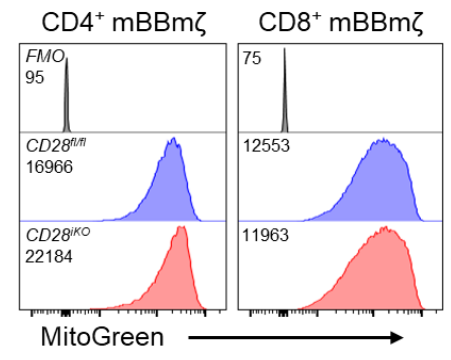

3C.

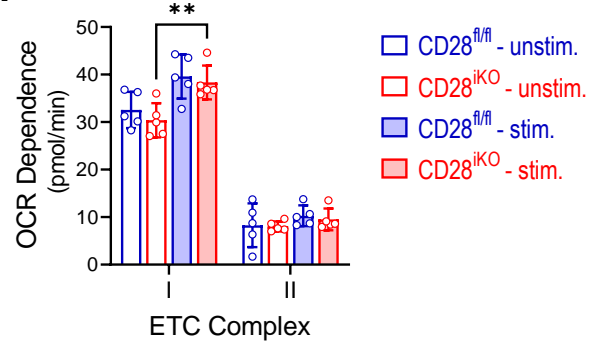

3D.

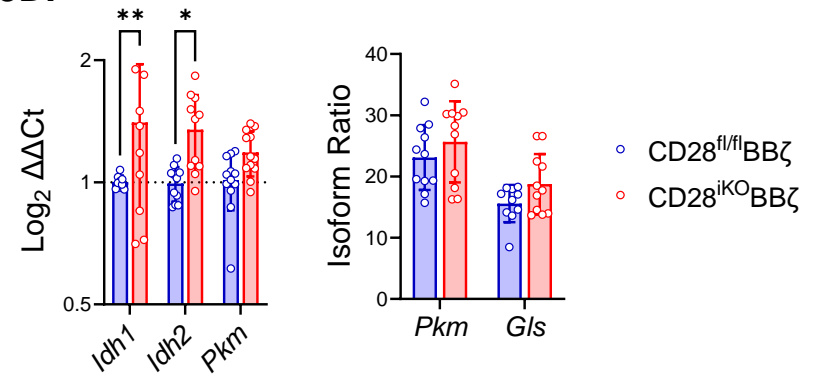

**Supplemental Fig. 4:**

**4A.**

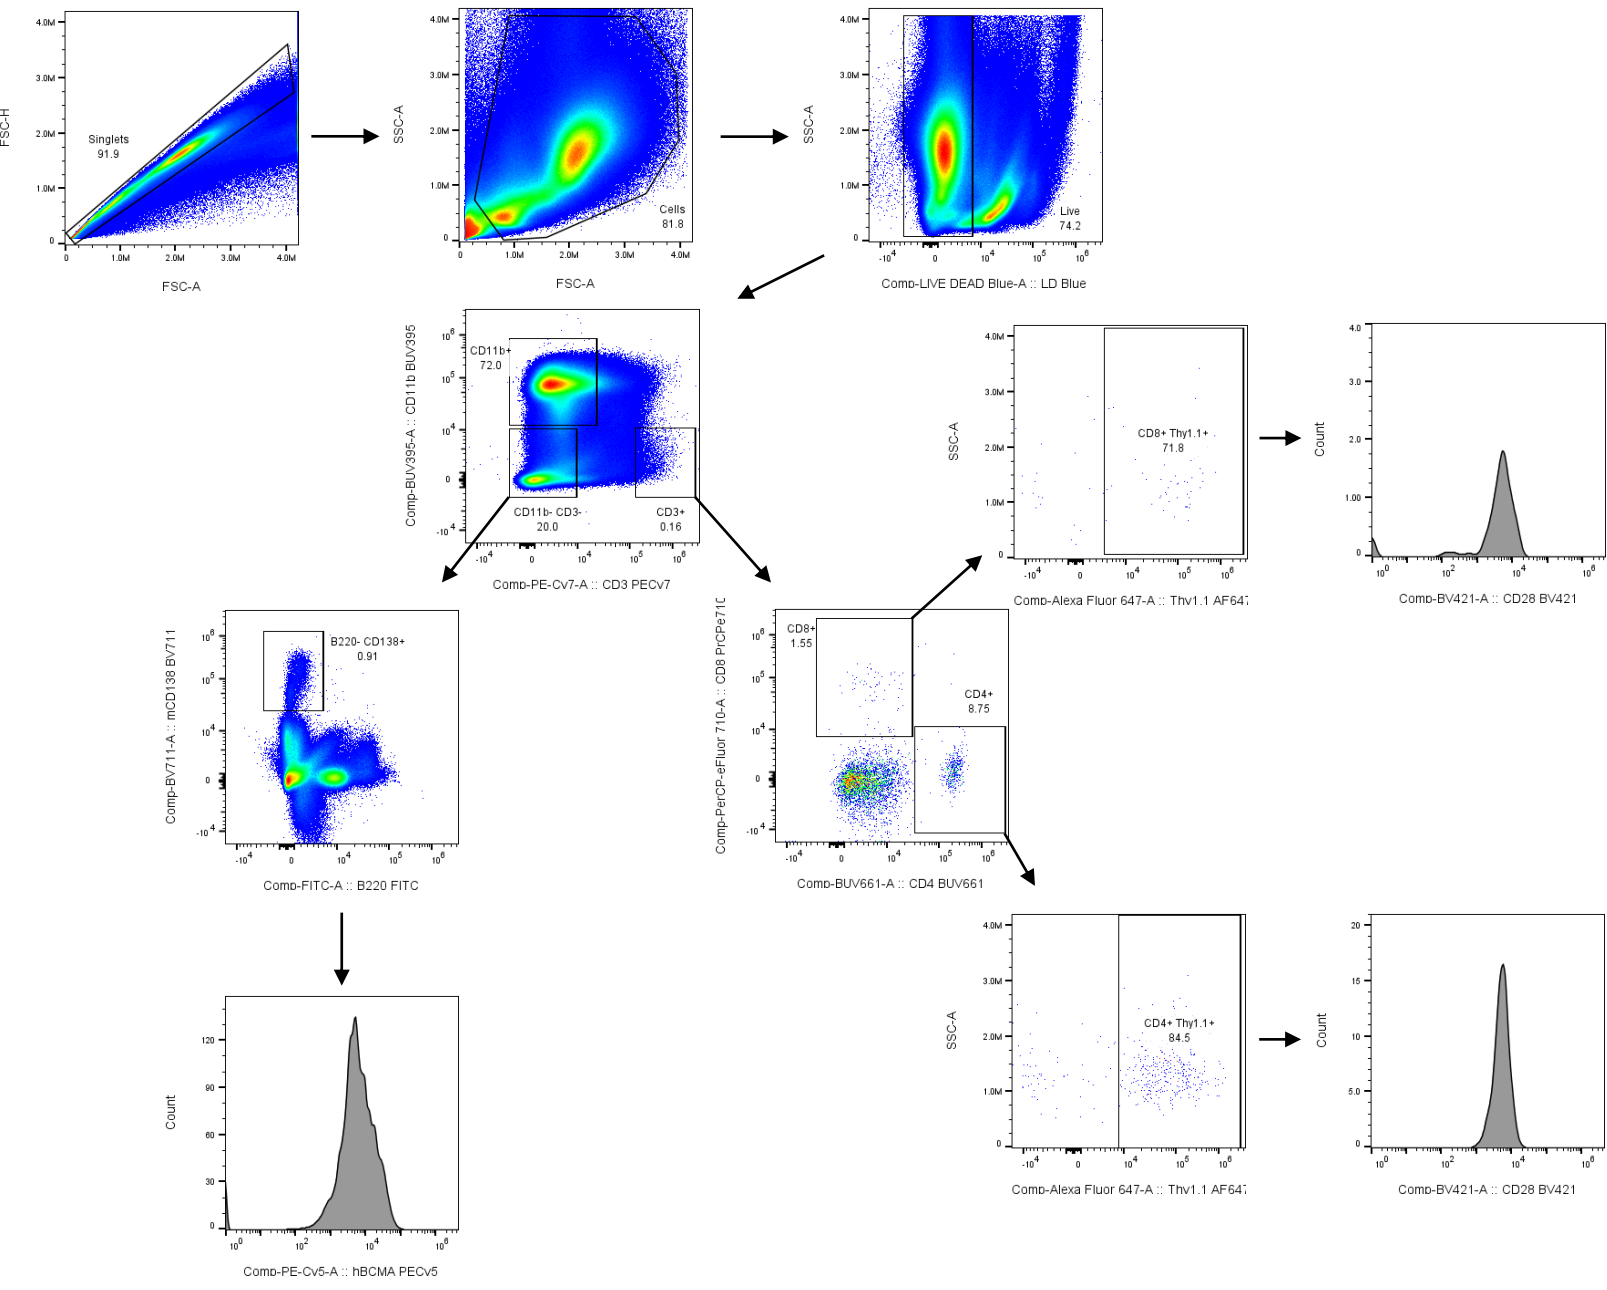

**4B.**

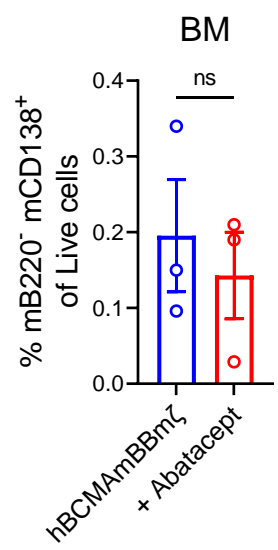

**4C.**

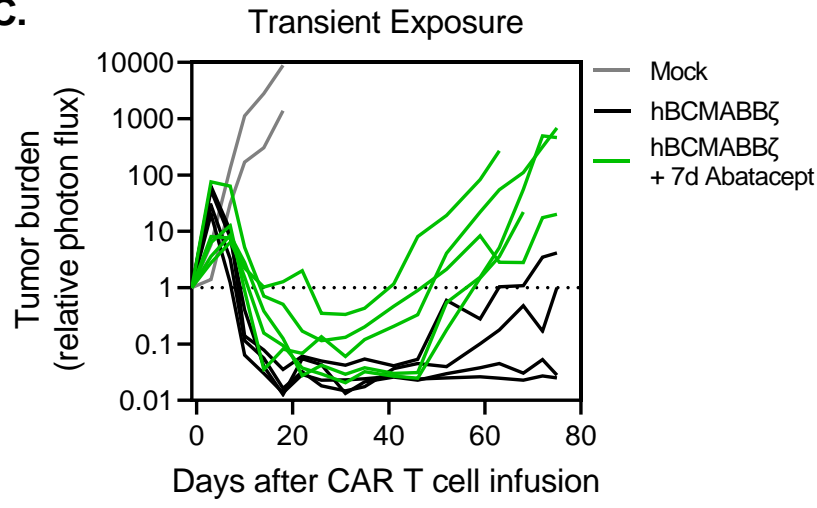

Supplement: media-2.pdf [file media-2.pdf]
